# Supplementary material for: NADPH Oxidase-Dependent Production of Reactive Oxygen Species Induces Endoplasmatic Reticulum Stress in Neutrophil-Like HL60 Cells
Source: PubMed Central journal article supplement (PMC4323339; doi:10.1371/journal.pone.0116410), 2015-02-10
Supplement: pone.0116410.s011.pdf [file pone.0116410.s011.pdf]

**Table S3.** ER calcium measurements (Indo 1:  $\lambda$  excitation= 331nm;  $\lambda$  emission= 410 nm – Fluorimeter analysis).

| ER             |             |          |         |                        |
|----------------|-------------|----------|---------|------------------------|
| Sample         | F (min)     | F (Peak) | F (max) | [Ca <sup>2+</sup> ] ER |
| dHL60 NG (n=1) | 288,8916667 | 655,4    | 1347    | 0,132485661            |
| dHL60 NG (n=2) | 215,3       | 748,1    | 1268    | 0,256203116            |
| dHL60 NG (n=3) | 198,6691667 | 707,5    | 1287    | 0,21951287             |
| dHL60 NG (n=4) | 218,9583333 | 787,5    | 1357    | 0,249579309            |
| dHL60 NG (n=5) | 153,7358333 | 579,7    | 1014    | 0,24520157             |
| dHL60 MN (n=1) | 267         | 889      | 1642    | 0,206507304            |
| dHL60 MN (n=2) | 255,3083333 | 933,3    | 1571    | 0,265795698            |
| dHL60 MN (n=3) | 209,35      | 807,8    | 1366    | 0,268026693            |
| dHL60 MN (n=4) | 208,0433333 | 897,8    | 1525    | 0,274934896            |
| dHL60 MN (n=5) | 212,1916667 | 718,6    | 1399    | 0,186070081            |
| dHL60 HG (n=1) | 285,0416667 | 865,2    | 1809    | 0,153676185            |
| dHL60 HG (n=2) | 209,1916667 | 782      | 1308    | 0,272247307            |
| dHL60 HG (n=3) | 199,5666667 | 715,8    | 1209    | 0,261675453            |
| dHL60 HG (n=4) | 203,3258333 | 783      | 1419    | 0,227859342            |
| dHL60 HG (n=5) | 164,8608333 | 585,1    | 1098    | 0,204834844            |

| ER             | dHL60 NG    | dHL60 MN    | dHL60 HG    |
|----------------|-------------|-------------|-------------|
|                | 0,132485661 | 0,206507304 | 0,153676185 |
|                | 0,256203116 | 0,265795698 | 0,272247307 |
|                | 0,21951287  | 0,268026693 | 0,261675453 |
|                | 0,249579309 | 0,274934896 | 0,227859342 |
|                | 0,24520157  | 0,186070081 | 0,204834844 |
| <b>Average</b> | 0,220596505 | 0,240266934 | 0,224058626 |
| <b>STDEV</b>   | 0,0511809   | 0,040930432 | 0,047631035 |
| <b>Error</b>   | 0,022888794 | 0,018304646 | 0,021301246 |

ER [Ca<sup>2+</sup>] was calculated using the following formula as previously reported in MacDougall et al., 1988 [33]:

$$[\text{Ca}^{2+}]_{\text{ER}} = 250 \text{ nM } (F - F_{\text{min}}) / (F_{\text{max}} - F) * 0,001$$
