# Supplementary material for: NADPH Oxidase-Dependent Production of Reactive Oxygen Species Induces Endoplasmatic Reticulum Stress in Neutrophil-Like HL60 Cells
Source: PubMed Central journal article supplement (PMC4323339; doi:10.1371/journal.pone.0116410), 2015-02-10
Supplement: pone.0116410.s012.pdf [file pone.0116410.s012.pdf]

**Table S4.** The cycle threshold (Ct) mean values of the UPR (GRP78, GADD34, CHOP, ATF4, ERdj4 and Herp) and reference control (GAPDH and 18S) genes.

| Sample | GAPDH | 18S   | GRP78 | GADD34 | CHOP  | ATF4  | ERdj4 |
|--------|-------|-------|-------|--------|-------|-------|-------|
| 16     | 16.69 | 5.37  | 16.22 | 21.03  | 19.78 | 16.56 | 20.24 |
| 17     | 17.92 | 6.10  | 16.26 | 20.51  | 19.55 | 15.55 | 20.44 |
| 18     | 16.46 | 5.29  | 15.87 | 20.23  | 19.01 | 15.53 | 19.57 |
| 19     | 17.28 | 5.37  | 17.06 | 17.13  | 16.35 | 15.63 | 18.71 |
| 20     | 16.55 | 5.12  | 15.94 | 16.24  | 16.27 | 14.75 | 19.31 |
| 21     | 17.18 | 4.37  | 16.21 | 16.30  | 16.08 | 14.45 | 18.32 |
| 22     | 17.35 | 5.08  | 16.06 | 15.83  | 14.54 | 13.83 | 18.37 |
| 23     | 17.41 | 5.12  | 16.32 | 15.71  | 14.84 | 14.40 | 18.40 |
| 24     | 16.60 | 5.86  | 16.17 | 15.66  | 14.52 | 13.72 | 18.50 |
| 25     | 17.15 | 6.65  | 17.75 | 16.20  | 16.29 | 14.42 | 19.27 |
| 26     | 15.53 | 5.34  | 15.99 | 15.29  | 16.16 | 14.40 | 17.78 |
| 27     | 16.30 | 5.93  | 16.27 | 15.35  | 16.10 | 12.94 | 18.22 |
| 28     | 18.10 | 5.91  | 17.90 | 16.82  | 16.56 | 13.56 | 20.24 |
| 29     | 17.86 | 6.05  | 17.83 | 16.33  | 16.50 | 13.66 | 20.13 |
| 30     | 16.78 | 5.24  | 17.13 | 15.58  | 15.68 | 12.88 | 19.66 |
| Blank  | 30.47 | 24.15 | ND    | 34.94  | 31.17 | 25.11 | ND    |

| Sample | GAPDH | 18S   | Herp  |
|--------|-------|-------|-------|
| 76     | 26.05 | 6.23  | 19.70 |
| 77     | 25.35 | 5.93  | 19.17 |
| 78     | 26.35 | 6.99  | 19.82 |
| 79     | 24.36 | 5.50  | 18.73 |
| 80     | 24.76 | 5.91  | 18.81 |
| 81     | 27.09 | 7.65  | 20.13 |
| 82     | 24.51 | 5.32  | 18.09 |
| 83     | 25.03 | 5.97  | 18.72 |
| 84     | 25.97 | 6.22  | 18.93 |
| 85     | 24.28 | 5.98  | 18.90 |
| 86     | 25.02 | 6.10  | 18.49 |
| 87     | 25.51 | 6.89  | 18.63 |
| 88     | 25.50 | 5.92  | 19.66 |
| 89     | 24.46 | 5.86  | 19.64 |
| 90     | 26.45 | 6.30  | 20.12 |
| Blank  | 34.67 | 23.93 | 34.27 |
